# Supplementary material for: The effect of hybrid SCMC (BYOD) on foreign language anxiety and learning experience in comparison to pure SCMC and FTF communication
Source: Frontiers journal article supplement (doi:10.3389/fpsyg.2023.1172442), 2023-07-25
Supplement: Data_Sheet_1.pdf [file Data_Sheet_1.pdf]

**Authors:** Elaine K. Horwitz, Michael B. Horwitz, and Joann Cope

**Article:** Foreign Language Classroom Anxiety

**Journal:** The Modern Language Journal

**Publisher:** John Wiley & Sons, Inc

**Copyright notice:** ©1986 *The Modern Language Journal*

Reproduced with permission from 'Foreign Language Classroom Anxiety', Elaine K. Horwitz, Michael B. Horwitz, and Joann Cope, published in *The Modern Language Journal*, 70, 125-132, 1986, by John Wiley & Sons, Inc., under license No. 5571420133254, with additional approval from the Wiley Permission Group to modify the source material.

## **Appendix I**

The Foreign Language Classroom Anxiety Scale (FLCAS)

Score range (1-5): 1 strongly disagree, 2 disagree, 3 undecided, 4 agree, 5 strongly agree

- 1\*. I never feel quite sure of myself when I am speaking in my foreign language class.
- 2\*. I don't worry about making mistakes in language class.
- 3\*. I tremble when I know that I'm going to be called on in language class.
- 4\*. It frightens me when I don't understand what the teacher is saying in the foreign language.
5. It wouldn't bother me at all to take more foreign language classes.
6. During language class, I find myself thinking about things that have nothing to do with the course.
7. I keep thinking that the other students are better at languages than I am.
- 8\*. I am usually at ease during tests in my language class.
- 9\*. I start to panic when I have to speak without preparation in language class.
10. I worry about the consequences of failing my foreign language class.
11. I don't understand why some people get so upset over foreign language classes.
- 12\*. In language class, I can get so nervous I forget things I know.

- 13\*. It embarrasses me to volunteer answers in my language class.
14. I would not be nervous speaking the foreign language with native speakers.
15. I get upset when I don't understand what the teacher is correcting.
- 16\*. Even if I am well prepared for language class, I feel anxious about it.
17. I often feel like not going to my language class.
- 18\*. I feel confident when I speak in foreign language class.
- 19\*. I am afraid that my language teacher is ready to correct every mistake I make.
- 20\*. I can feel my heart pounding when I'm going to be called on in language class.
21. The more I study for a language test, the more confused I get.
22. I don't feel pressure to prepare very well for language class.
23. I always feel that the other students speak the foreign language better than I do.
- 24\*. I feel very self-conscious about speaking the foreign language in front of other students.
25. Language class moves so quickly I worry about getting left behind.
- 26\*. I feel more tense and nervous in my language class than in my other classes.
- 27\*. I get nervous and confused when I am speaking in my language class.
28. When I'm on my way to language class, I feel very sure and relaxed.
- 29\*. I get nervous when I don't understand every word the language teacher says.
30. I feel overwhelmed by the number of rules you have to learn to speak a foreign language.
- 31\*. I am afraid that the other students will laugh at me when I speak the foreign language.
32. I would probably feel comfortable around native speakers of the foreign language.
- 33\*. I get nervous when the language teacher asks questions which I haven't prepared in advance.
